1 Comparative analysis of droplet-based ultra-high-throughput  
2 single-cell RNA-seq systems

3  
4 Xiannian Zhang,<sup>1,#</sup> Tianqi Li,<sup>2,#</sup> Feng Liu,<sup>3,#</sup> Yaqi Chen,<sup>4,#</sup> Jiacheng Yao,<sup>2</sup> Zeyao  
5 Li,<sup>5</sup> Yanyi Huang,<sup>1,\*</sup> and Jianbin Wang<sup>2,\*</sup>

6  
7 <sup>1</sup>Beijing Advanced Innovation Center for Genomics (ICG), Biodynamics Optical  
8 Imaging Center (BIOPIC), School of Life Sciences, College of Engineering, and  
9 Peking-Tsinghua Center for Life Sciences, Peking University, Beijing 100871,  
10 China, <sup>2</sup>School of Life Sciences, and Tsinghua-Peking Center for Life Sciences,  
11 Tsinghua University, Beijing 100084, China, <sup>3</sup>National Research Center for  
12 Translational Medicine (Shanghai), State Key Laboratory of Medical Genomics,  
13 Ruijin Hospital, Shanghai Jiao Tong University School of Medicine, Shanghai  
14 200025, China, <sup>4</sup>Peking University Shenzhen Graduate School, Shenzhen  
15 518055, China, <sup>5</sup>School of Life Sciences, and Peking-Tsinghua-NIBS Joint  
16 Graduate Program, Tsinghua University, Beijing 100084, China

17  
18 #These authors contributed equally to this work.

19 \*Correspondence: [yanyi@pku.edu.cn](mailto:yanyi@pku.edu.cn) (Y.H.) or [jianbinwang@tsinghua.edu.cn](mailto:jianbinwang@tsinghua.edu.cn)  
20 (J.W.)

21  
22  
23  
24  
25  
26  
27  
28

## 29 Summary

30 Since its establishment in 2009, single-cell RNA-seq has been a major driver  
31 behind progress in biomedical research. In developmental biology and stem cell  
32 studies, the ability to profile single cells confers particular benefits. While most  
33 studies still focus on individual tissues or organs, the recent development of ultra-  
34 high-throughput single-cell RNA-seq has demonstrated potential power in  
35 characterizing more complex systems or even the entire body. However, although  
36 multiple ultra-high-throughput single-cell RNA-seq systems have attracted  
37 attention, no systematic comparison of these systems has been performed. Here,  
38 we focus on three widely used droplet-based ultra-high-throughput single-cell  
39 RNA-seq systems, inDrop, Drop-seq, and 10X Genomics Chromium. While each  
40 system is capable of profiling single-cell transcriptomes, their detailed comparison  
41 revealed the distinguishing features and suitable applications for each system.

42

43

## 44 Introduction

45 Single-cell RNA-seq (scRNA-seq), which was first established in 2009 (Tang et al., 2009),  
46 has become one of the most powerful approaches for revealing biological heterogeneity.  
47 The ability to manipulate picograms of RNA in single cells has enabled the performance of  
48 studies with unprecedented temporal and spatial resolution. Based on the substantial data  
49 of the whole transcriptome, scRNA-seq has provided comprehensive information on  
50 landscapes of gene expression and their regulatory interactions at the finest resolution,  
51 enabling accurate and precise depiction of cell types and states (Grun and van  
52 Oudenaarden, 2015; Tanay and Regev, 2017; Wu et al., 2017). In the last decade, the  
53 sensitivity and precision of mRNA quantification through scRNA-seq have been greatly  
54 improved (Hashimshony et al., 2016; Picelli et al., 2014), leading to revolutionary  
55 discoveries in many fields, such as cell-type identification in various tissues or organs  
56 (Jaitin et al., 2014; Lake et al., 2016; Papalexi and Satija, 2018; Treutlein et al., 2014;  
57 Villani et al., 2017); tracing cell lineage and fate commitment in embryonic development and  
58 cell differentiation (Olsson et al., 2016; Semrau et al., 2017; Tirosh et al., 2016; Yan et al.,  
59 2013); drawing inferences on transcriptional dynamics and regulatory networks (Deng et al.,

60 2014; Dixit et al., 2016); and identifying the development, evolution, and heterogeneity of  
61 tumors (Patel et al., 2014; Treutlein et al., 2014; Venteicher et al., 2017).

62

63 The experimental throughput is always a major concern in the design of scRNA-seq  
64 experiments. In some biological systems, such as early-stage embryos, only dozens of cells  
65 are required to achieve critical findings (Yan et al., 2013). However, owing to tissue  
66 complexity, the dynamicity of the cell cycle, or other intrinsic variations (Buettner et al.,  
67 2015), as well as technical noise (Brennecke et al., 2013), RNA-seq data from a small  
68 number of cells are typically inadequate to reflect the state of biological samples  
69 comprehensively (Tanay and Regev, 2017). The sensitivity of transcriptome detection is  
70 known to become rapidly saturated with increasing sequencing depth (Svensson et al.,  
71 2017). The shallow sequencing of massively sampled single cells can effectively reduce  
72 random variation and define cell types through clustering analysis, providing a more robust  
73 approach (Pollen et al., 2014; Streets and Huang, 2014; Svensson et al., 2018). For large-  
74 scale scRNA-seq studies, a major technical hurdle is the cost of preparing a large number  
75 of cDNA libraries. Laboratory automation can overcome the laboriousness of this approach,  
76 but the reagents are still expensive (Jaitin et al., 2014). A few recently reported microfluidic  
77 approaches have demonstrated various advantages in scRNA-seq (Prakadan et al., 2017).  
78 For example, small-volume reactors may improve reaction efficiency and reduce technical  
79 noise when coupled with appropriate chemistry (Streets et al., 2014; Wu et al., 2014).  
80 Moreover, lab-on-a-chip operations have also made single-cell isolation much easier than  
81 manual cell picking (Shalek et al., 2014). Microwell-based scRNA-seq methods (Fan et al.,  
82 2015; Han et al., 2018) have also exhibited advantages in terms of low cost and high  
83 throughput. However, owing to the lack of commercially available instruments or detailed  
84 protocols, microwell-based scRNA-seq has not been widely adopted.

85

86 Droplet microfluidics can achieve rapid compartmentation and encapsulation at a frequency  
87 of up to dozens of thousands of droplets per second and be easily scaled to produce  
88 millions of droplets, each having a nanoliter volume to accommodate single-cell reactions  
89 (Agresti et al., 2010). The microfluidic pipeline layout is very simple, consisting mainly of  
90 microchannels introducing/collecting reagents and samples (Duncombe et al., 2015). This  
91 droplet strategy greatly increases the reaction throughput and dramatically reduces the  
92 cost. Currently, there are three prevalent droplet-based systems for high-throughput

93 scRNA-seq, namely, inDrop (Briggs et al., 2018; Klein et al., 2015; Wagner et al., 2018;  
94 Zilionis et al., 2017), Drop-seq (Farrell et al., 2018; Macosko et al., 2015), and 10X  
95 Genomics Chromium (10X) (Zheng et al., 2017). All of these have been demonstrated to be  
96 robust and practical in generating cDNA libraries for thousands of cells in a single run at  
97 acceptable cost. All three methods use similar designs to generate droplets, use on-bead  
98 primers with barcodes to differentiate individual cells, and apply a unique molecular  
99 identifier (UMI) for bias correction (Kivioja et al., 2011). Despite these similarities, they  
100 involve different approaches for bead manufacturing, barcode design, and cDNA  
101 amplification, and thus have different experimental protocols. Given these differences in  
102 system specifications and potentially in the results of transcriptome analysis (Ziegenhain et  
103 al., 2017), there is a need for a systematic and unbiased comparison among these  
104 methods.

105  
106 Here, we compare the performance of these three approaches using the same sample with  
107 a unified data processing pipeline. We generated two to three replicates for each method  
108 using the lymphoblastoid cell line GM12891. The mean sequencing depth was around  
109 50,000–60,000 reads per cell barcode. We also developed a versatile and rapid data  
110 processing workflow and applied it for all datasets. Cell capture efficiency, effective read  
111 proportion, barcode detection error, and transcript detection sensitivity were analyzed and  
112 compared. The results reveal strengths and weaknesses in each system and provide  
113 guidance for the selection of the most appropriate system in future research.

114  
115

## 116 Results

### 117 System overview

118 Among the three systems, inDrop and Drop-seq have been extensively described in the  
119 literature, whereas 10X is a commercial platform whose design details have not been fully  
120 disclosed. We here attempt to dissect these systems to the best of our ability based on the  
121 information that we could collect. In all three systems, the cell barcodes are embedded in  
122 microbead-tethered primers (Figure 1A). The DNA sequences of on-bead primers share a  
123 common structure, containing a PCR handle, cell barcode, UMI, and poly-T. The primer on  
124 the inDrop beads also has a photo-cleavable moiety and a T7 promoter. However, the  
125 beads are fabricated with different materials. The beads used in 10X and inDrop systems

126 are made of hydrogel, while Drop-seq uses brittle resin. Normally, beads and cells are  
127 introduced at low concentration to reduce the chance of forming doublets; that is, two cells  
128 or two beads are encapsulated in a single droplet. Therefore, for Drop-seq that uses small  
129 hard beads, encapsulation of one bead and one cell in the same droplet follows a double  
130 Poisson distribution. The hydrogel beads are soft and deformable, closely packed in the  
131 microfluidic channel, and their encapsulation can be synchronized to achieve a super-  
132 Poissonian distribution (Figure 1A) (Abate et al., 2009). Although 100% single-bead  
133 occupancy is very difficult due to inevitable variation in bead size, the cell capture efficiency  
134 can reach markedly higher levels in 10X and inDrop approaches. 10X is reported to have  
135 ~80% bead occupancy and a cell capture rate of ~50% (Zheng et al., 2017).

136

137 The material of the beads may also influence the quantity and density of DNA primers. The  
138 use of a hydrogel for 10X and inDrop allows the immobilization of primers throughout the  
139 beads, whereas the smaller Drop-seq beads can only carry primers on the surface. After  
140 encapsulation, the entire beads from 10X are dissolved to release all of the primers into the  
141 solution phase to boost the efficiency of mRNA capture. inDrop also mobilizes the primers  
142 by UV-irradiation-induced cleavage. In contrast, Drop-seq uses surface-tethered primers to  
143 capture the mRNA molecules, which could reduce the capture efficiency compared with that  
144 for 10X and inDrop.

145

146 Reverse transcription is carried out within droplets for 10X and inDrop before  
147 demulsification. Instead, Drop-seq only captures the transcripts without cDNA conversion.  
148 Reverse transcription in droplets can confer more uniform results due to the isolation of  
149 many local reactions and the reduction of reaction competition. It is also known that the  
150 performance of a reaction in a limited volume such as a droplet enhances the specificity of  
151 cDNA conversion and relative yield (Streets et al., 2014). The three systems adopt different  
152 strategies for cDNA amplification. InDrop employs CEL-Seq (Hashimshony et al., 2012),  
153 whereas 10X and Drop-seq follow a template-switching protocol (Macosko et al., 2015;  
154 Zheng et al., 2017) similar to the popular Smart-seq chemistry (Ramskold et al., 2012). The  
155 *in vitro* transcription step in inDrop extends the library preparation time beyond 24 h, while  
156 both Drop-seq and 10X pipelines can be completed within a day.

157

158 **Experimental design and data processing**

159 We used GM12891, a human lymphoblastoid cell line, for our comparative study. Biological  
160 replicates were set up for all three systems, with various cell inputs on different days and in  
161 different batches (Figure 1B). We adjusted the sequencing depth to obtain comparable  
162 numbers of reads per cell barcode across the three systems.

163

164 Each system has its own data processing pipeline. However, none of them can directly  
165 handle data generated by other systems due to differences in read structures. Each  
166 analysis pipeline has to cope with system-dependent data characteristics, for example, the  
167 tolerance of cell barcode errors. Besides, the analysis pipelines use different strategies in  
168 some key processes such as gene tagging. All of these differences may introduce bias in  
169 gene quantification, which is not ideal when attempting to perform a fair comparison among  
170 the systems. To solve this problem, we developed a versatile pipeline that accepts data  
171 from all of these systems and generates matrices of UMI counts (Figure 1C). We applied  
172 this pipeline to our data and conducted comparisons on sensitivity, precision, and bias in an  
173 objective way.

174

175 The script of the pipeline is freely available online (<https://github.com/beiseq/baseqDrops>)  
176 for download. It was designed to accept paired-end sequencing data with one end (read 1)  
177 containing the cell barcode and UMI, and the other end (read 2) containing the transcript  
178 sequence. The pipeline first identifies cell barcodes in read 1 raw data. After removing cell  
179 barcodes with read counts that are too low (miscellaneous barcodes), the pipeline corrects  
180 cell barcode errors (see Methods for details). These errors may have been introduced  
181 during on-bead primer synthesis and also during PCR or sequencing steps. Reads with the  
182 same cell barcodes are aggregated, and invalid cell barcodes are removed after filtering by  
183 read counts. For 10X and inDrop in which barcodes are not completely random, the pipeline  
184 further filters the cell barcodes based on manufacturers' whitelists.

185

186 Read 2 sequences are mapped to the human reference genome (hg38) using STAR (Dobin  
187 et al., 2013) and then tagged to the corresponding genes. We also processed the datasets  
188 with each protocol's official pipeline. We then compared the obtained results with those  
189 from our versatile pipeline. The expression levels of the majority of genes and the UMI  
190 counts in each barcode were found to be highly consistent among the different data  
191 processing methods (see Methods, Figure S2A, B). To confirm the accuracy of transforming

192 aligned reads to the corresponding genes, we performed simulation by generating around 2  
193 million reads based on the cell line's gene expression profile (ref. f). More than 99% of the  
194 reads (2,229,156 out of 2,251,529) were tagged to the correct gene (see Methods, Figure  
195 S2C). The remaining 1% of ambiguous reads were mainly derived from genes with  
196 paralogs or overlapping genes, such as RPL41/ AC090498.1 or IGHA1/IGHA2 (Table S2).  
197 After read-to-gene assignment, the reads for each gene in each cell were grouped and their  
198 UMIs were aggregated and counted by allowing a 1-bp mismatch, thus generating a gene  
199 expression UMI matrix.

200

201 The processing speed of this pipeline was optimized by reducing the read/write payload,  
202 which is a common bottleneck. For example, ~50% of reads from inDrop data have an  
203 invalid sequence structure. By removing these reads, we can increase the data processing  
204 efficiency. Furthermore, the reads are split into multiple (typically 16) files, based on the cell  
205 barcode prefix, which enables parallel processing.

206

### 207 **Quality of primers on beads**

208 The barcode library size determines the maximum capacity for a single experimental run  
209 using droplet-based scRNA-seq. A small cell barcode library might result in barcode  
210 collision and artificial doublets. In the information accompanying the three systems,  
211 theoretical cell barcode library sizes of  $1.47 \times 10^5$  (inDrop),  $1.6 \times 10^7$  (Drop-seq), and  
212  $7.34 \times 10^5$  (10X) are claimed. However, the effective barcode library size may be smaller  
213 than the designed value. We estimated the proportion of effective barcodes by analyzing  
214 the barcode collisions between multiple runs from each system (see Methods). The  
215 likelihood analysis demonstrated the relative probability of observing such a number of  
216 collisions at different effective barcode fractions (Figure 2A). For inDrop, our results suggest  
217 an effective barcode proportion of around 30%, although 100% effectiveness is also  
218 possible with smaller possibility. The analysis is less powerful for larger libraries, but we can  
219 still determine the lower bound for Drop-seq (~10%) and 10X (~40%). The likelihood of an  
220 effective barcode proportion smaller than the lower bound is relatively low. Thus, by rough  
221 estimation, the effective barcode size is  $\sim 5 \times 10^4$  for inDrop and at least  $1 \times 10^6$  for Drop-seq  
222 and  $3 \times 10^5$  for 10X (see Methods).

223

224 One-barcode-one-bead is the key requirement for all three systems. However, owing to the  
225 imperfection in the chemistry of DNA synthesis, asynchronous base addition is inevitable.  
226 Inconsistency in the sequences of cell barcodes could thus arise within the same bead.  
227 Such presence of errors in cell barcodes would result in inflation of the number of detected  
228 single cells, which requires careful correction. We aggregated the cell barcodes within 1  
229 Hamming distance. For each valid cell barcode, the proportion of the corrected reads  
230 (which contains errors in raw barcode sequences) to the total reads after correction is  
231 calculated as the cell barcode error rate (Figure 2B), which reflects the general quality of  
232 on-bead DNA primers. 10X beads showed few mismatches in cell barcodes, indicating  
233 good quality control in bead fabrication. In contrast, more than half of the cell barcodes  
234 contained obvious mismatches in the other two systems. Specifically, about 10% of Drop-  
235 seq beads contained a one-base deletion in cell barcodes, which also required extra care  
236 during data analysis (see Methods).

237

238 We further analyzed the base composition of UMI, which could reflect its synthesis and  
239 usage bias (Figure 2C, Table S1). All systems showed bias or preference for poly-T due to  
240 its affinity to the poly-A tail of mRNA. We also found the enrichment of poly-C in inDrop, and  
241 of poly-G in Drop-seq and 10X. Such patterns, predominantly due to DNA synthesis bias,  
242 may cause system-dependent skewness of the RNA-seq results.

243

244 The primary filtering criterion for valid cell barcodes is based on the total number of raw  
245 reads, which largely reflects the abundance of cellular mRNAs. A cell barcode with more  
246 reads is more likely to originate from a real cell. The cell barcodes were sorted and  
247 visualized by their read counts, and we observed different features in the three systems  
248 (Figure 2D). For 10X, a sharp cliff indicated the distinct difference in read counts between  
249 barcodes from healthy cells and others. For inDrop, there was a similar but subtler cliff. For  
250 Drop-seq, however, there was no obvious cliff on the read-count curve for a clear cut-off.  
251 This might have originated from the wide size distribution of beads used by Drop-seq. We  
252 noticed that the size of beads used in inDrop or 10X was more uniform than that in Drop-  
253 seq (Figure S1), probably due to the difficulties in size control when fabricating resin beads.

254

255 **Data processing steps and results**



256 It is challenging to accurately determine the cell number, represented by cell barcodes, in  
257 each sample. This is due to the large dispersion in cellular mRNA molecular counts and  
258 their capture efficiency. We attempted multiple strategies to estimate the valid cell numbers  
259 (see Methods, Figure S3). Many of these methods rely on certain assumptions about the  
260 read/UMI distribution or cell composition, which might not apply for all protocols or  
261 situations. We implemented a strategy that started from a certain number of cells  
262 determined experimentally, followed by strict quality control filtering (UMIs  $\geq 1000$  and  
263 nearest correlation  $\geq 0.6$ ). This strategy has been implemented by multiple groups in  
264 recently reported high-throughput scRNA-seq studies. For each run, the number of  
265 recovered cells could be roughly estimated by considering the number of input cells, cell  
266 capture ratio, and downstream reaction success ratio, in accordance with system-specific  
267 protocols. Then, the estimated cells were further filtered to satisfy the quality control criteria  
268 (see Methods).

269

270 The reads split into each valid cell barcode are first aligned to the human genome to  
271 analyze the distribution of reads throughout the genome (Figure 3A). Drop-seq has more  
272 than 65% of the reads mapped to UTR (mainly 3'UTR) and exon regions, while this  
273 proportion in inDrop is only about 45%. After the tagging of reads that map to gene bodies,  
274 the numbers of detectable genes can be obtained (Figure 3B). The number of genes  
275 declines in accordance with the number of reads within a cell, except for several outliers in  
276 Drop-seq data. We use those detected genes to demonstrate the bias of read distribution  
277 along the gene body (Figure 3C). The reads were mainly derived from the 3' end of the  
278 mRNA for all three systems, consistent with their library construction strategies. Drop-seq  
279 data showed a bimodal distribution, most likely due to the same PCR anchor sequences  
280 being used at both ends of cDNA molecules.

281

282 We performed cell barcode filtering based on the total count of UMIs (transcripts) in each  
283 experimental run (Figure 3D). With a total UMI cut-off of 1,000, most of the cell barcodes  
284 passed the filter, which indicates that the estimated cell number is sound. To further remove  
285 possible artifacts caused by barcode errors, we checked the similarity of expression profiles  
286 between similar cell barcodes. If the expression profile of a cell barcode was markedly  
287 different from its closest cell barcode neighbor (Spearman's correlation  $\leq 0.6$ , see  
288 Methods), we discarded the barcode (Figure 3E, see Methods).

289

290 Through all of these steps, we obtained various numbers of cells in each experiment  
291 (Figure 3F). The proportion of effective reads (reads from valid barcodes) was ~75% for  
292 10X, ~25% for inDrop, and ~30% for Drop-seq (Figure 3G). The proportion of such reads  
293 should be maximized to reduce wastage of sequencing capacity.

294

### 295 **Sensitivity of UMI and gene detection**

296 The sensitivity of gene detection is a fundamental indicator of the performance of scRNA-  
297 seq. It reflects the overall efficiency of a method for capturing a single mRNA molecule for  
298 reverse transcription, second-strand synthesis, and pre-amplification. It further influences  
299 and determines the precision and accuracy of gene expression quantification. With the  
300 same cell line as an input sample, the sensitivity can be depicted simply with the recovered  
301 UMIs and gene counts (Figure 4A). The UMI and gene numbers gradually become  
302 saturated for cell barcodes with increasing read counts (Figure S4A, B). We found that the  
303 log-transformed UMI count is highly correlated (Spearman's correlation  $r > 0.9$ ) with the  
304 number of detected genes (Figure S4C). This shows that sequencing depth may influence  
305 the numbers of UMIs and genes detected. For a fair comparison among the three different  
306 systems, we normalized the dataset to achieve a uniform raw read level (36K/cell) before  
307 gene expression analysis (see Methods). The technical replicates from the same system  
308 showed high consistency and reproducibility. 10X had the highest sensitivity, capturing over  
309 17,000 transcripts from ~3,000 genes on average. This performance was consistent  
310 regardless of the number of input cells. Drop-seq detected ~8,000 transcripts from ~2,500  
311 genes. Meanwhile, the inDrop system had lower sensitivity, detecting ~2,700 UMIs from  
312 ~1,250 genes. The read distribution is more skewed in inDrop and Drop-seq, for which the  
313 majority of cell barcodes have relatively low read counts (Figure 4B).

314

### 315 **Technical noise and precision**

316 Technical noise is a reflection of the variation conferred by experimental randomness,  
317 including transcript dropout in reverse transcription and the bias associated with PCR  
318 amplification. Precision can be assessed by the concordance of the transcriptome among  
319 technical replicates. The main purpose of performing single-cell RNA-seq is to cluster cells  
320 into different subgroups based on their gene expression profiles, typically for discovering  
321 and characterizing new cell types or states. Clustering is based on the similarities or  
322 distances of gene expression patterns among cells. Large technical noise or variation will

323 distort the actual distances and obscure subtle biological differences between cells, thus  
324 lowering the resolution of cell grouping. Many efforts have been made to reduce the  
325 technical noise, such as the use of UMI to eliminate the quantification error caused by  
326 amplification bias.

327

328 Although we here use an apparently homogeneous cell line, there is still intrinsic biological  
329 noise or heterogeneity (Prakadan et al., 2017). In our dataset, the total variation consists of  
330 technical and biological components, which are difficult to separate. Here, we assume that  
331 biological noise is consistent among samples and that technical noise dominates the  
332 variation in the datasets. The noise levels of housekeeping genes (which show a minimal  
333 level of biological noise) and other genes have similar distributions, which indicates the low  
334 level of biological noise compared with technical noise (Figure S5, see Methods). Thus, the  
335 overall total variation should reflect the technical noise level.

336

337 The overall total variation is characterized as the nearest Spearman's correlation between a  
338 specific cell barcode and every other cell barcode in the entire dataset (see Methods).  
339 Many clustering/classification strategies, such as k-means and hierarchical clustering, are  
340 based on the nearest correlation between the cells. To identify minor cell types, the nearest  
341 correlation among these minor cells should be high to enable their separation from other  
342 cells. To validate the effect of UMIs in reducing the PCR amplification noise of gene  
343 counting, we performed the analysis using UMI counts and raw read counts for the  
344 quantification of gene expression. The results (Figure 4C) show that 10X and Drop-seq  
345 have lower technical noise levels than inDrop. For all three systems, gene expression  
346 profiles characterized by UMI have reduced noise compared with those using raw counts,  
347 confirming the effectiveness of UMI in noise reduction. It is noteworthy that such noise is  
348 more severe in inDrop data, probably due to the use of random primers during library  
349 construction. For 10X, however, the usage of UMI does not dramatically reduce noise. This  
350 is probably due to relatively even amplification during 10X sample preparation. In addition,  
351 most UMIs were sequenced only two to three times, suggesting a less saturated  
352 sequencing depth. For deeper sequencing, the use of UMI can probably reduce the noise  
353 further.

354

355 The technical variation at the gene level can be measured by the coefficient of variation  
356 (CV) of normalized UMI (UMIs per million) counts across all cells (Figure 4D, see Methods).  
357 This provides a view of the technical noise on the whole gene expression profile. All  
358 systems show reduced variation for genes with higher expression levels. Generally, 10X  
359 has the lowest technical noise, followed by Drop-seq and then inDrop. Interestingly, many  
360 of the most highly expressed genes are quite noisy, especially in the 10X data. We  
361 examined these genes (normalized UMI  $\geq 2,000$ , CV  $\geq 0.5$ ) and found that most of them  
362 were the cell line's most highly expressed genes or mitochondrial genes (Table S3). High  
363 noise in these genes was probably introduced by the stochastic manner of bursts by which  
364 transcription occurs (Sanchez and Golding, 2013).

365

### 366 **Saturation of sensitivity and precision at low sequencing depth**

367 The ability to detect transcripts present at a low level could be enhanced by performing  
368 deeper sequencing. However, there is a trade-off between costs and sensitivity, especially  
369 for high-throughput experiments. Empirically, it has been shown that each cell gets 10,000–  
370 100,000 reads in high-throughput scRNA-seq experiments, whereas for conventional  
371 scRNA-seq data the corresponding value is usually  $\sim 1$  million reads per cell (Baran-Gale et  
372 al., 2017). A previous study based on a mathematical model suggested that shallow  
373 sequencing (1% of conventional depth) can also be informative regarding cell status  
374 (Heimberg et al., 2016). We randomly subsampled sequencing data and analyzed the  
375 corresponding changes in sensitivity and precision (Figures 5A, B and S6). The fitted  
376 saturation curves of UMI and gene counts help to determine a suitable sequencing depth  
377 for most applications.

378

379 All of the systems show diminishing returns at higher depths. For more sensitive methods, it  
380 is possible to detect the same level of UMIs with fewer reads. All three methods can reach  
381 a threshold of 1000 UMIs with fewer than 10K reads. 10X can detect 10,000 UMIs with  
382 about 20K reads as a median, while for Drop-Seq the value is 50K. These both exceed the  
383 capacity of inDrop. We also evaluated how many reads per cell are needed to reach 80% of  
384 the total saturated UMIs for Drop-Seq ( $\sim 80K$ ) and inDrop ( $\sim 60K$ ) (Figure S6A). In contrast,  
385 10X requires  $\sim 200K$  reads/cell to accomplish this due to the higher sensitivity. Detection  
386 sensitivity of gene numbers saturated faster. To reach the 80% saturation level,  $\sim 30K$

387 reads/cell are needed for inDrop or Drop-seq, while ~80K reads/cell are needed for 10X  
388 (Figure S6B).

389

390 Other than sensitivity, precision also determines a system's resolution for making  
391 biological discoveries. Here, the precision is measured as the nearest correlation  
392 between one cell and the others, which also indicates the level of technical noise.  
393 We investigated how the precision level was affected by the sequencing depth  
394 and found that the precision index rapidly saturated with increasing read depth ( $\geq$   
395 20,000 effective reads) for all three systems (Figure 5C).

396

397 These results help us to establish appropriate empirical guidelines for  
398 experimental design. For the most commonly performed tasks such as cell typing,  
399 a median number of 20,000 reads/cell should be sufficient. However, it should be  
400 noted that these results are from a cell line with abundant mRNA. The desired  
401 sequencing depth should be considered based on both the sensitivity of protocols  
402 and the input RNA content. For cells with lower transcription activities such as  
403 primary cells, a lower level of sequencing depth could be sufficient for each  
404 protocol.

405

#### 406 **Bias in gene quantification**

407 To comprehensively compare the transcriptomes depicted by different systems, we  
408 conducted dimension reduction with principal component analysis (PCA) and *t*-distributed  
409 stochastic neighbor embedding (tSNE) analyses (Figure 6A). Almost all of the cells were  
410 robustly separated and clustered according to their system of origin. Although there is  
411 biological and technical variation within cells from the same run, which results in great  
412 diversity in sequencing reads, and in gene and UMI counts, the bias between different  
413 systems still exceeds the level of these variations. As the replicates are processed in  
414 different batches and days, the batch effect is also obscure. Within the same system,  
415 different batches of data show a very homogeneous distribution (Figure S7).

416

417 The separation of cells by system indicates that there is system-specific quantification bias  
418 at the gene level. Potential biases in the mRNA enrichment at the gene level could be  
419 related to three major factors: expression abundance (normalized to UMIs per million), gene

420 length, and GC content. We hence selected the top 100 marker genes (see Methods) from  
421 each method and analyzed the distribution of these factors (Figure 6B–D). These genes  
422 showed consistent expression intensity among biological replicates. We found that,  
423 compared with the other systems, 10X slightly favored shorter genes and genes with higher  
424 GC content, whereas Drop-seq better detected genes with lower GC content. This  
425 observation echoes a previous report describing that Drop-seq overestimates transcription  
426 of genes with low GC ratio or long sequence (Macosko et al., 2015).

427

428 In summary, all of the methods appear to be very consistent and homogeneous among  
429 technical replicates from different batches. This indicates the validity of combining different  
430 datasets together from the same method. However, different protocols have obvious bias  
431 related to gene length and GC content. Thus, combining these datasets directly will  
432 introduce extra divergence.

433

434

## 435 Discussion

436 We have compared the three most widely used droplet-based high-throughput  
437 single-cell RNA-seq systems, inDrop, Drop-seq, and 10X, using the same cell  
438 sample and a unified data processing pipeline to reduce bias in experimental  
439 design and data analyses. Technical replicates were included to identify possible  
440 batch-dependent artifacts. For each system, we sequenced thousands of single  
441 cells. Through quantitative analysis of a few key parameters using our unified data  
442 processing pipeline, we have clarified the characteristics of each system.

443 Generally, after filtering out artifacts and errors, all three systems produced quality  
444 data for single-cell expression profiling. The cell typing analysis indicated obscure  
445 batch effects, but noticeable clustering bias in association with the system of  
446 choice. This indicates that cell typing analysis using datasets from a mixture of  
447 systems is technically challenging and should be avoided.

448

449 In this study, we chose a lymphoblastoid cell line for the analysis because cell line  
450 quality is highly controllable. At least for technical evaluation, we wished to reduce  
451 the variation of sample quality on the obtained results as much as possible.

452 However, direct comparisons using primary cells, especially those with low mRNA

453 contents, would be more informative. To expand the scope of our study, we  
454 further processed HEK293 cells with 10X system and included some datasets  
455 produced by the original developers of the three systems (Klein et al., 2015;  
456 Macosko et al., 2015; Zheng et al., 2017). As summarized in Table S5, 10X  
457 demonstrates higher sensitivity, detecting roughly twice as many of UMIs as  
458 inDrop and Drop-seq do from various kinds of cell. The results from the inDrop  
459 developers are better than ours. We attribute this discrepancy to batch-to-batch  
460 variation in bead quality. As we showed above, inDrop cell barcode error rate is  
461 much higher than those of Drop-seq and 10X (Figure 2B). Being labeled with  
462 defective barcodes would deem the transcripts undetectable since the very  
463 beginning. More than half of inDrop sequencing data were wasted due to a failure  
464 of matching with the cell barcodes in our data. Feedback from other inDrop users  
465 showed that the equivalent proportions from different batches of beads range from  
466 25% to 65% (unpublished results). We also tested the impact of mRNA content on  
467 system performance. When using half of HEK293 cDNA for downstream library  
468 preparation, we detected roughly half UMI as in normal HEK293 (Table S5). All  
469 these abovementioned results suggest that our findings based on the  
470 lymphoblastoid cell line can be generalized to other cell types.

471

472 For all three systems, the beads are specifically provided by the particular  
473 manufacturer and would probably be difficult to produce in small laboratories.  
474 Thus, the quality of the beads, such as their size dispersity, is particularly  
475 important to define the robustness and uniformity of reverse transcription and  
476 further reactions. Moreover, the fidelity and purity of the barcode sequences on  
477 each bead are also key factors affecting the bioinformatics pipeline, for which  
478 artifacts and errors should be minimized.

479

480 Our comparison shows that 10X generally has higher molecular sensitivity and  
481 precision, and less technical noise. As a more maturely commercialized system,  
482 the 10X protocol should have been extensively optimized, which is partially  
483 reflected in the barcode design and quality control of bead manufacture. However,  
484 high-performance optimization also comes with a high price tag. Specifically, the

485 instrument costs more than \$50,000, and the per cell cost is around \$0.50 even  
486 without considering the sequencing cost or instrument depreciation (Table S6).

487

488 With small compromises in sensitivity and precision, Drop-seq exhibits a  
489 significant advantage in experimental cost compared with 10X, which is typically  
490 the major concern when a large number of single cells are needed. As an open-  
491 source system (except for the beads), Drop-seq has gained popularity since its  
492 introduction in 2015. As of the time of writing, the Drop-seq protocol has been  
493 downloaded nearly 60,000 times. Building up the whole system costs less than  
494 \$30,000. The experimental cost of Drop-seq is about \$0.10 per cell (Table S6).  
495 Drop-seq is thus a reasonable choice for individual labs given its balanced  
496 performance and economical nature.

497

498 To a certain extent, inDrop can be considered an open-source version of 10X.  
499 Both of them use hydrogel beads for super-Poissonian loading. Their on-bead  
500 primers are both releasable to facilitate the capture of transcripts. The instrument  
501 cost is comparable to that of 10X, and the per cell cost is about half that of 10X  
502 (Table S6). We attribute the lower performance of inDrop to its excessive cDNA  
503 amplification (Hashimshony et al., 2016), as well as the fact that the protocol has  
504 yet to be completely optimized. As an open-source system, inDrop can adopt  
505 other chemistries, and be easily modified for different types of RNA-seq protocols.  
506 In a preliminary experiment, we tested the implementation of Smart-seq2, the  
507 most widely used scRNA-seq protocol, on the inDrop system. The cDNA profile  
508 closely resembled conventional Smart-seq2 products (Figure 7A). We further  
509 tested different conditions for reverse transcription and cDNA amplification.  
510 Similar to the results generated by the official protocol, a significant proportion  
511 (~40%) of reads in the new data could not be assigned to genuine cell barcodes.  
512 Our briefly optimized protocol generated results for UMI and gene detection  
513 comparable to those with the official protocol (Figure 7B–D, Table S4). Although  
514 the sensitivity of transcription detection was still lower than in the other two  
515 systems, our preliminary results demonstrated the flexibility of inDrop, and that the  
516 system could be desirable for nonstandard approaches or technical development.

517



518 With all of the system-specific features mentioned above, we proposed guidance  
519 to facilitate the choice of a suitable droplet-based scRNA-seq system for ultra-  
520 high-throughput single-cell studies. While most projects work with relatively large  
521 cell numbers, precious samples such as human embryos require efficient cell  
522 capture. A super-Poissonian distribution of cell capture could be essential for such  
523 samples. The requirements regarding the experimental cost and efficiency of  
524 transcript detection depend on the specific scenario. Generally, all three systems  
525 offer satisfactory transcript detection efficiency, and higher efficiency is associated  
526 with higher experimental cost. By rule of thumb, 10X is currently a safe choice for  
527 most applications. When the sample is abundant, Drop-seq could be more cost-  
528 efficient. In contrast, when the detection of low-abundance transcripts is optional,  
529 or a custom protocol is desired, inDrop becomes a better choice.

530

## 531 Acknowledgments

532 We thank Fan Wu for testing the data process pipeline. This work was supported  
533 by the National Natural Science Foundation of China (21327808, 21525521 to  
534 Yanyi Huang and 21675098 to Jianbin Wang), Ministry of Science and  
535 Technology of China (2016YFC0900100 to Jianbin Wang), and Beijing Advance  
536 Innovation Center for Genomics.

537

## 538 Author Contributions

539 Y.H. and J.W. conceived the project. T.L., F.L., and J.Y. performed experiments. X.Z., Z.L.,  
540 Y.C., and J.Y. analyzed data. All authors participated in manuscript preparation.

541

## 542 Declaration of Interests

543 The authors declare no competing interests.

544

## 545 Data availability

546 The data can be accessed in GEO using accession code GSE111912.

547

## 548 References

- 549 Abate, A.R., Chen, C.H., Agresti, J.J., and Weitz, D.A. (2009). Beating Poisson  
550 encapsulation statistics using close-packed ordering. *Lab Chip* 9, 2628-2631.
- 551 Agresti, J.J., Antipov, E., Abate, A.R., Ahn, K., Rowat, A.C., Baret, J.C., Marquez, M.,  
552 Klibanov, A.M., Griffiths, A.D., and Weitz, D.A. (2010). Ultrahigh-throughput screening in  
553 drop-based microfluidics for directed evolution. *Proc Natl Acad Sci U S A* 107, 4004-4009.
- 554 Baran-Gale, J., Chandra, T., and Kirschner, K. (2017). Experimental design for single-cell  
555 RNA sequencing. *Brief Funct Genomics*.
- 556 Brennecke, P., Anders, S., Kim, J.K., Kolodziejczyk, A.A., Zhang, X., Proserpio, V., Baying,  
557 B., Benes, V., Teichmann, S.A., Marioni, J.C., *et al.* (2013). Accounting for technical noise  
558 in single-cell RNA-seq experiments. *Nat Methods* 10, 1093-1095.
- 559 Briggs, J.A., Weinreb, C., Wagner, D.E., Megason, S., Peshkin, L., Kirschner, M.W., and  
560 Klein, A.M. (2018). The dynamics of gene expression in vertebrate embryogenesis at  
561 single-cell resolution. *Science*.
- 562 Buettner, F., Natarajan, K.N., Casale, F.P., Proserpio, V., Scialdone, A., Theis, F.J.,  
563 Teichmann, S.A., Marioni, J.C., and Stegle, O. (2015). Computational analysis of cell-to-cell  
564 heterogeneity in single-cell RNA-sequencing data reveals hidden subpopulations of cells.  
565 *Nat Biotechnol* 33, 155-160.
- 566 Deng, Q., Ramskold, D., Reinius, B., and Sandberg, R. (2014). Single-cell RNA-seq reveals  
567 dynamic, random monoallelic gene expression in mammalian cells. *Science* 343, 193-196.
- 568 Dixit, A., Parnas, O., Li, B., Chen, J., Fulco, C.P., Jerby-Arnon, L., Marjanovic, N.D.,  
569 Dionne, D., Burks, T., Raychowdhury, R., *et al.* (2016). Perturb-Seq: Dissecting Molecular  
570 Circuits with Scalable Single-Cell RNA Profiling of Pooled Genetic Screens. *Cell* 167, 1853-  
571 1866 e1817.
- 572 Dobin, A., Davis, C.A., Schlesinger, F., Drenkow, J., Zaleski, C., Jha, S., Batut, P.,  
573 Chaisson, M., and Gingeras, T.R. (2013). STAR: ultrafast universal RNA-seq aligner.  
574 *Bioinformatics* 29, 15-21.
- 575 Duncombe, T.A., Tentori, A.M., and Herr, A.E. (2015). Microfluidics: reframing biological  
576 enquiry. *Nat Rev Mol Cell Biol* 16, 554-567.
- 577 Fan, H.C., Fu, G.K., and Fodor, S.P. (2015). Expression profiling. Combinatorial labeling of  
578 single cells for gene expression cytometry. *Science* 347, 1258367.
- 579 Farrell, J.A., Wang, Y., Riesenfeld, S.J., Shekhar, K., Regev, A., and Schier, A.F. (2018).  
580 Single-cell reconstruction of developmental trajectories during zebrafish embryogenesis.  
581 *Science*.
- 582 Grun, D., and van Oudenaarden, A. (2015). Design and Analysis of Single-Cell Sequencing  
583 Experiments. *Cell* 163, 799-810.
- 584 Han, X., Wang, R., Zhou, Y., Fei, L., Sun, H., Lai, S., Saadatpour, A., Zhou, Z., Chen, H.,  
585 Ye, F., *et al.* (2018). Mapping the Mouse Cell Atlas by Microwell-Seq. *Cell* 172, 1091-1107  
586 e1017.
- 587 Hashimshony, T., Senderovich, N., Avital, G., Klochendler, A., de Leeuw, Y., Anavy, L.,  
588 Gennert, D., Li, S., Livak, K.J., Rozenblatt-Rosen, O., *et al.* (2016). CEL-Seq2: sensitive  
589 highly-multiplexed single-cell RNA-Seq. *Genome Biol* 17, 77.
- 590 Hashimshony, T., Wagner, F., Sher, N., and Yanai, I. (2012). CEL-Seq: single-cell RNA-  
591 Seq by multiplexed linear amplification. *Cell Rep* 2, 666-673.
- 592 Heimberg, G., Bhatnagar, R., El-Samad, H., and Thomson, M. (2016). Low Dimensionality  
593 in Gene Expression Data Enables the Accurate Extraction of Transcriptional Programs from  
594 Shallow Sequencing. *Cell Syst* 2, 239-250.

595 Jaitin, D.A., Kenigsberg, E., Keren-Shaul, H., Elefant, N., Paul, F., Zaretsky, I., Mildner, A.,  
596 Cohen, N., Jung, S., Tanay, A., *et al.* (2014). Massively parallel single-cell RNA-seq for  
597 marker-free decomposition of tissues into cell types. *Science* *343*, 776-779.  
598 Kivioja, T., Vaharautio, A., Karlsson, K., Bonke, M., Enge, M., Linnarsson, S., and Taipale,  
599 J. (2011). Counting absolute numbers of molecules using unique molecular identifiers. *Nat*  
600 *Methods* *9*, 72-74.  
601 Klein, A.M., Mazutis, L., Akartuna, I., Tallapragada, N., Veres, A., Li, V., Peshkin, L., Weitz,  
602 D.A., and Kirschner, M.W. (2015). Droplet barcoding for single-cell transcriptomics applied  
603 to embryonic stem cells. *Cell* *161*, 1187-1201.  
604 Lake, B.B., Ai, R., Kaeser, G.E., Salathia, N.S., Yung, Y.C., Liu, R., Wildberg, A., Gao, D.,  
605 Fung, H.L., Chen, S., *et al.* (2016). Neuronal subtypes and diversity revealed by single-  
606 nucleus RNA sequencing of the human brain. *Science* *352*, 1586-1590.  
607 Macosko, E.Z., Basu, A., Satija, R., Nemesh, J., Shekhar, K., Goldman, M., Tirosh, I.,  
608 Bialas, A.R., Kamitaki, N., Martersteck, E.M., *et al.* (2015). Highly Parallel Genome-wide  
609 Expression Profiling of Individual Cells Using Nanoliter Droplets. *Cell* *161*, 1202-1214.  
610 Olsson, A., Venkatasubramanian, M., Chaudhri, V.K., Aronow, B.J., Salomonis, N., Singh,  
611 H., and Grimes, H.L. (2016). Single-cell analysis of mixed-lineage states leading to a binary  
612 cell fate choice. *Nature* *537*, 698-702.  
613 Papalexi, E., and Satija, R. (2018). Single-cell RNA sequencing to explore immune cell  
614 heterogeneity. *Nat Rev Immunol* *18*, 35-45.  
615 Patel, A.P., Tirosh, I., Trombetta, J.J., Shalek, A.K., Gillespie, S.M., Wakimoto, H., Cahill,  
616 D.P., Nahed, B.V., Curry, W.T., Martuza, R.L., *et al.* (2014). Single-cell RNA-seq highlights  
617 intratumoral heterogeneity in primary glioblastoma. *Science* *344*, 1396-1401.  
618 Picelli, S., Faridani, O.R., Bjorklund, A.K., Winberg, G., Sagasser, S., and Sandberg, R.  
619 (2014). Full-length RNA-seq from single cells using Smart-seq2. *Nat Protoc* *9*, 171-181.  
620 Pollen, A.A., Nowakowski, T.J., Shuga, J., Wang, X., Leyrat, A.A., Lui, J.H., Li, N.,  
621 Szpankowski, L., Fowler, B., Chen, P., *et al.* (2014). Low-coverage single-cell mRNA  
622 sequencing reveals cellular heterogeneity and activated signaling pathways in developing  
623 cerebral cortex. *Nat Biotechnol* *32*, 1053-1058.  
624 Prakadan, S.M., Shalek, A.K., and Weitz, D.A. (2017). Scaling by shrinking: empowering  
625 single-cell 'omics' with microfluidic devices. *Nat Rev Genet* *18*.  
626 Ramskold, D., Luo, S., Wang, Y.C., Li, R., Deng, Q., Faridani, O.R., Daniels, G.A.,  
627 Khrebtukova, I., Loring, J.F., Laurent, L.C., *et al.* (2012). Full-length mRNA-Seq from single-  
628 cell levels of RNA and individual circulating tumor cells. *Nat Biotechnol* *30*, 777-782.  
629 Sanchez, A., and Golding, I. (2013). Genetic determinants and cellular constraints in noisy  
630 gene expression. *Science* *342*, 1188-1193.  
631 Semrau, S., Goldmann, J.E., Soumillon, M., Mikkelsen, T.S., Jaenisch, R., and van  
632 Oudenaarden, A. (2017). Dynamics of lineage commitment revealed by single-cell  
633 transcriptomics of differentiating embryonic stem cells. *Nat Commun* *8*, 1096.  
634 Shalek, A.K., Satija, R., Shuga, J., Trombetta, J.J., Gennert, D., Lu, D., Chen, P., Gertner,  
635 R.S., Gaublomme, J.T., Yosef, N., *et al.* (2014). Single-cell RNA-seq reveals dynamic  
636 paracrine control of cellular variation. *Nature* *510*, 363-369.  
637 Streets, A.M., and Huang, Y. (2014). How deep is enough in single-cell RNA-seq? *Nat*  
638 *Biotechnol* *32*, 1005-1006.  
639 Streets, A.M., Zhang, X., Cao, C., Pang, Y., Wu, X., Xiong, L., Yang, L., Fu, Y., Zhao, L.,  
640 Tang, F., *et al.* (2014). Microfluidic single-cell whole-transcriptome sequencing. *Proc Natl*  
641 *Acad Sci U S A* *111*, 7048-7053.  
642 Svensson, V., Natarajan, K.N., Ly, L.H., Miragaia, R.J., Labalette, C., Macaulay, I.C.,  
643 Cvejic, A., and Teichmann, S.A. (2017). Power analysis of single-cell RNA-sequencing  
644 experiments. *Nat Methods* *14*, 381-387.

- 645 Svensson, V., Vento-Tormo, R., and Teichmann, S.A. (2018). Exponential scaling of single-  
646 cell RNA-seq in the past decade. *Nat Protoc* 13, 599-604.
- 647 Tanay, A., and Regev, A. (2017). Scaling single-cell genomics from phenomenology to  
648 mechanism. *Nature* 541, 331-338.
- 649 Tang, F., Barbacioru, C., Wang, Y., Nordman, E., Lee, C., Xu, N., Wang, X., Bodeau, J.,  
650 Tuch, B.B., Siddiqui, A., *et al.* (2009). mRNA-Seq whole-transcriptome analysis of a single  
651 cell. *Nat Methods* 6, 377-382.
- 652 Tirosh, I., Venteicher, A.S., Hebert, C., Escalante, L.E., Patel, A.P., Yizhak, K., Fisher, J.M.,  
653 Rodman, C., Mount, C., Filbin, M.G., *et al.* (2016). Single-cell RNA-seq supports a  
654 developmental hierarchy in human oligodendroglioma. *Nature* 539, 309-313.
- 655 Treutlein, B., Brownfield, D.G., Wu, A.R., Neff, N.F., Mantalas, G.L., Espinoza, F.H., Desai,  
656 T.J., Krasnow, M.A., and Quake, S.R. (2014). Reconstructing lineage hierarchies of the  
657 distal lung epithelium using single-cell RNA-seq. *Nature* 509, 371-375.
- 658 Venteicher, A.S., Tirosh, I., Hebert, C., Yizhak, K., Neftel, C., Filbin, M.G., Hovestadt, V.,  
659 Escalante, L.E., Shaw, M.L., Rodman, C., *et al.* (2017). Decoupling genetics, lineages, and  
660 microenvironment in IDH-mutant gliomas by single-cell RNA-seq. *Science* 355.
- 661 Villani, A.C., Satija, R., Reynolds, G., Sarkizova, S., Shekhar, K., Fletcher, J., Griesbeck,  
662 M., Butler, A., Zheng, S., Lazo, S., *et al.* (2017). Single-cell RNA-seq reveals new types of  
663 human blood dendritic cells, monocytes, and progenitors. *Science* 356.
- 664 Wagner, D.E., Weinreb, C., Collins, Z.M., Briggs, J.A., Megason, S.G., and Klein, A.M.  
665 (2018). Single-cell mapping of gene expression landscapes and lineage in the zebrafish  
666 embryo. *Science*.
- 667 Wu, A.R., Neff, N.F., Kalisky, T., Dalerba, P., Treutlein, B., Rothenberg, M.E., Mburu, F.M.,  
668 Mantalas, G.L., Sim, S., Clarke, M.F., *et al.* (2014). Quantitative assessment of single-cell  
669 RNA-sequencing methods. *Nat Methods* 11, 41-46.
- 670 Wu, A.R., Wang, J., Streets, A.M., and Huang, Y. (2017). Single-Cell Transcriptional  
671 Analysis. *Annu Rev Anal Chem (Palo Alto Calif)* 10, 439-462.
- 672 Yan, L., Yang, M., Guo, H., Yang, L., Wu, J., Li, R., Liu, P., Lian, Y., Zheng, X., Yan, J., *et*  
673 *al.* (2013). Single-cell RNA-Seq profiling of human preimplantation embryos and embryonic  
674 stem cells. *Nat Struct Mol Biol* 20, 1131-1139.
- 675 Zheng, G.X., Terry, J.M., Belgrader, P., Ryvkin, P., Bent, Z.W., Wilson, R., Ziraldo, S.B.,  
676 Wheeler, T.D., McDermott, G.P., Zhu, J., *et al.* (2017). Massively parallel digital  
677 transcriptional profiling of single cells. *Nat Commun* 8, 14049.
- 678 Ziegenhain, C., Vieth, B., Parekh, S., Reinius, B., Guillaumet-Adkins, A., Smets, M.,  
679 Leonhardt, H., Heyn, H., Hellmann, I., and Enard, W. (2017). Comparative Analysis of  
680 Single-Cell RNA Sequencing Methods. *Mol Cell* 65, 631-643 e634.
- 681 Zilionis, R., Nainys, J., Veres, A., Savova, V., Zemmour, D., Klein, A.M., and Mazutis, L.  
682 (2017). Single-cell barcoding and sequencing using droplet microfluidics. *Nat Protoc* 12, 44-  
683 73.

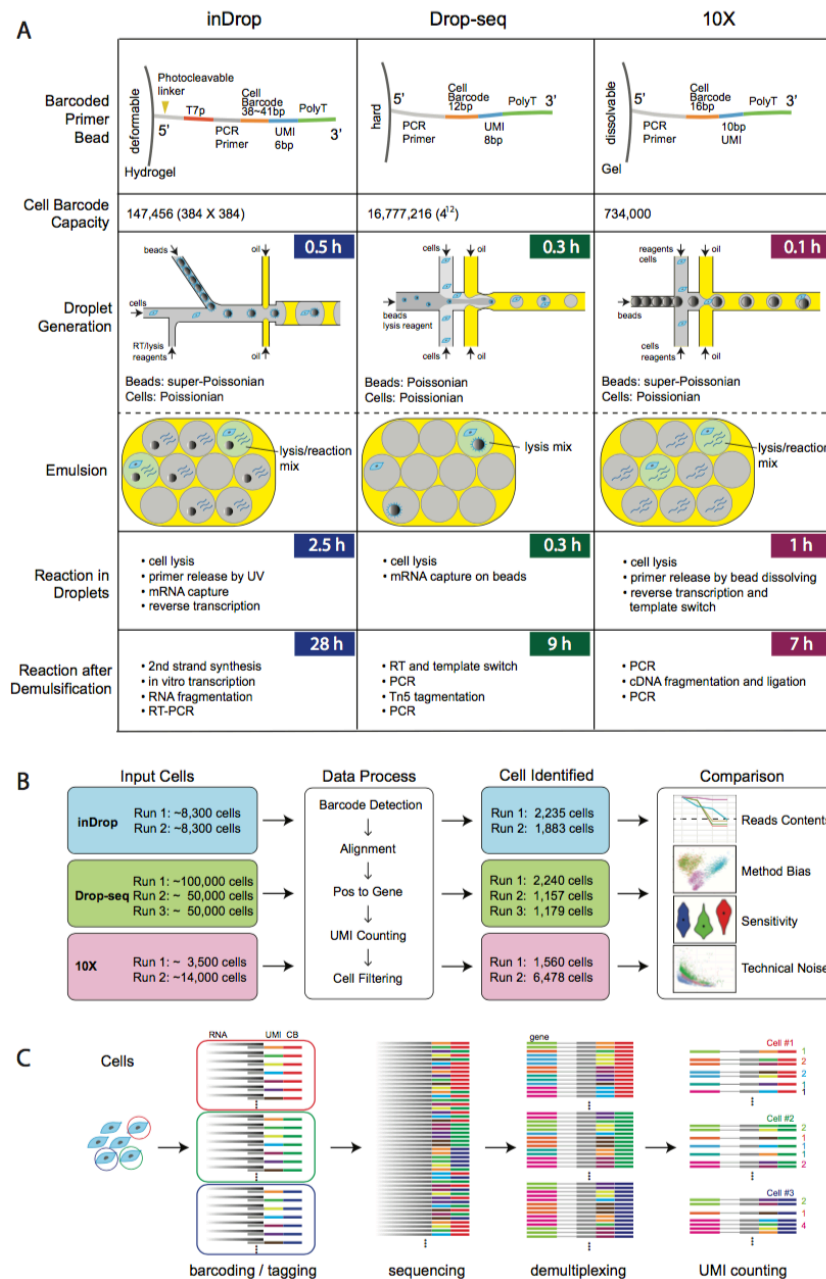

684

685

686

687

688

689

690

691

692

693

694

Figure 1: Overview of the three platforms, experimental design, and data analysis pipeline. (A) Schematic and comparison of experimental features of the three systems. They differ in terms of barcode design, library size, emulsion, and downstream reactions. (B) Experimental scheme summary. Two or three replicates were performed for each platform and the same data processing pipeline was used for downstream analysis. The numbers of input and recovered cells are labeled. (C) Overview of the data processing pipeline workflow. The sequencing reads that result from barcoding and tagging in reverse transcription are first demultiplexed by their cell barcodes and then the UMIs mapped to each gene are aggregated and counted.

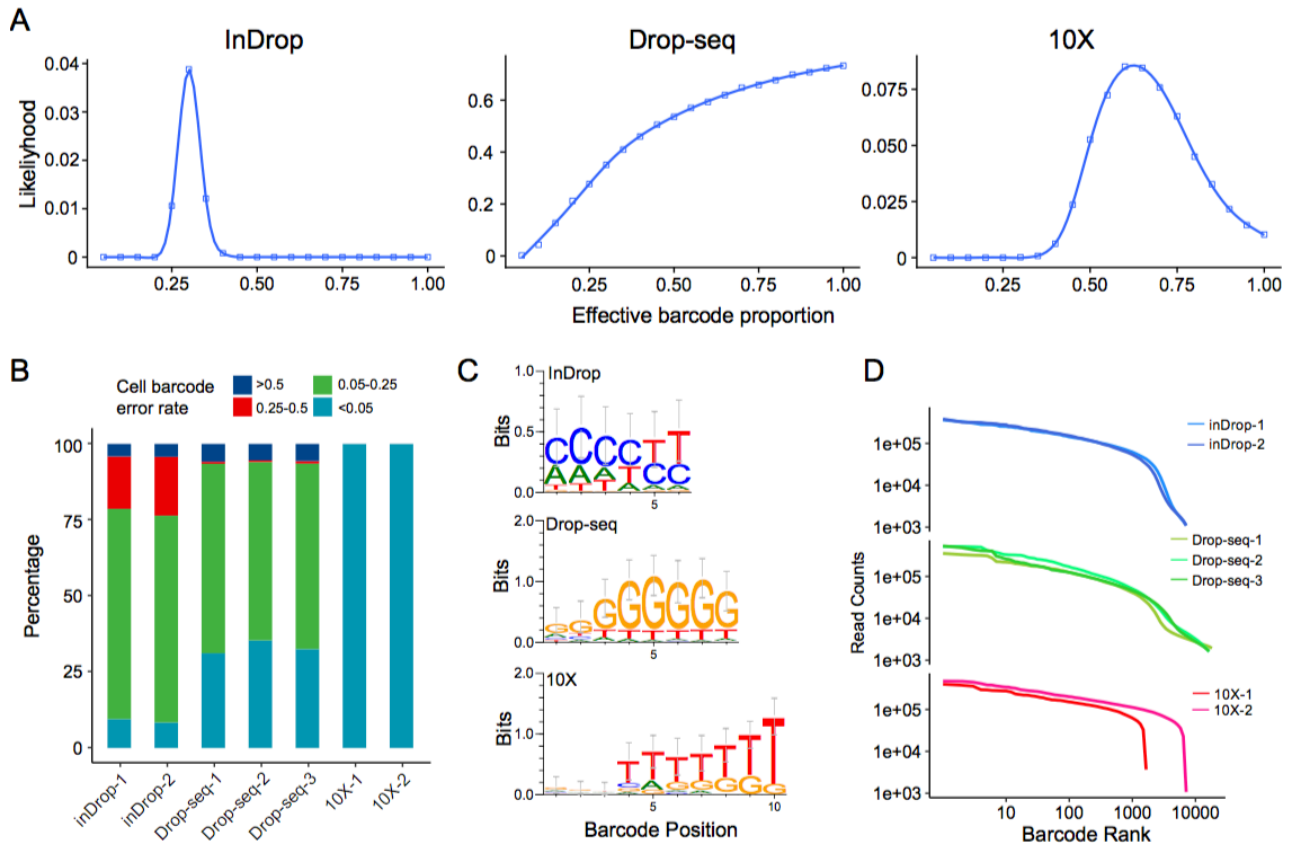

695

696

697 Figure 2. On-bead primer library size and quality assessment. (A) Estimation of effective  
 698 cell barcode library size for each system. The likelihood of different effective barcode  
 699 proportion is shown. The likelihood analysis is based on the observed barcode collisions  
 700 between different samples from the same system (see Methods). (B) Distribution of cell  
 701 barcode error rate. The error rate was measured as the proportion of corrected reads (1-bp  
 702 mismatch) relative to the total reads. (C) The motif of the top 50 frequently used UMIs for  
 703 each system. (D) The primary estimation of the valid cell barcode numbers according to the  
 704 read counts. Cell barcodes in the same sample are ordered by their read counts. The top N  
 705 cell barcodes are selected according to input cells and experimental capture efficiency.

706

707

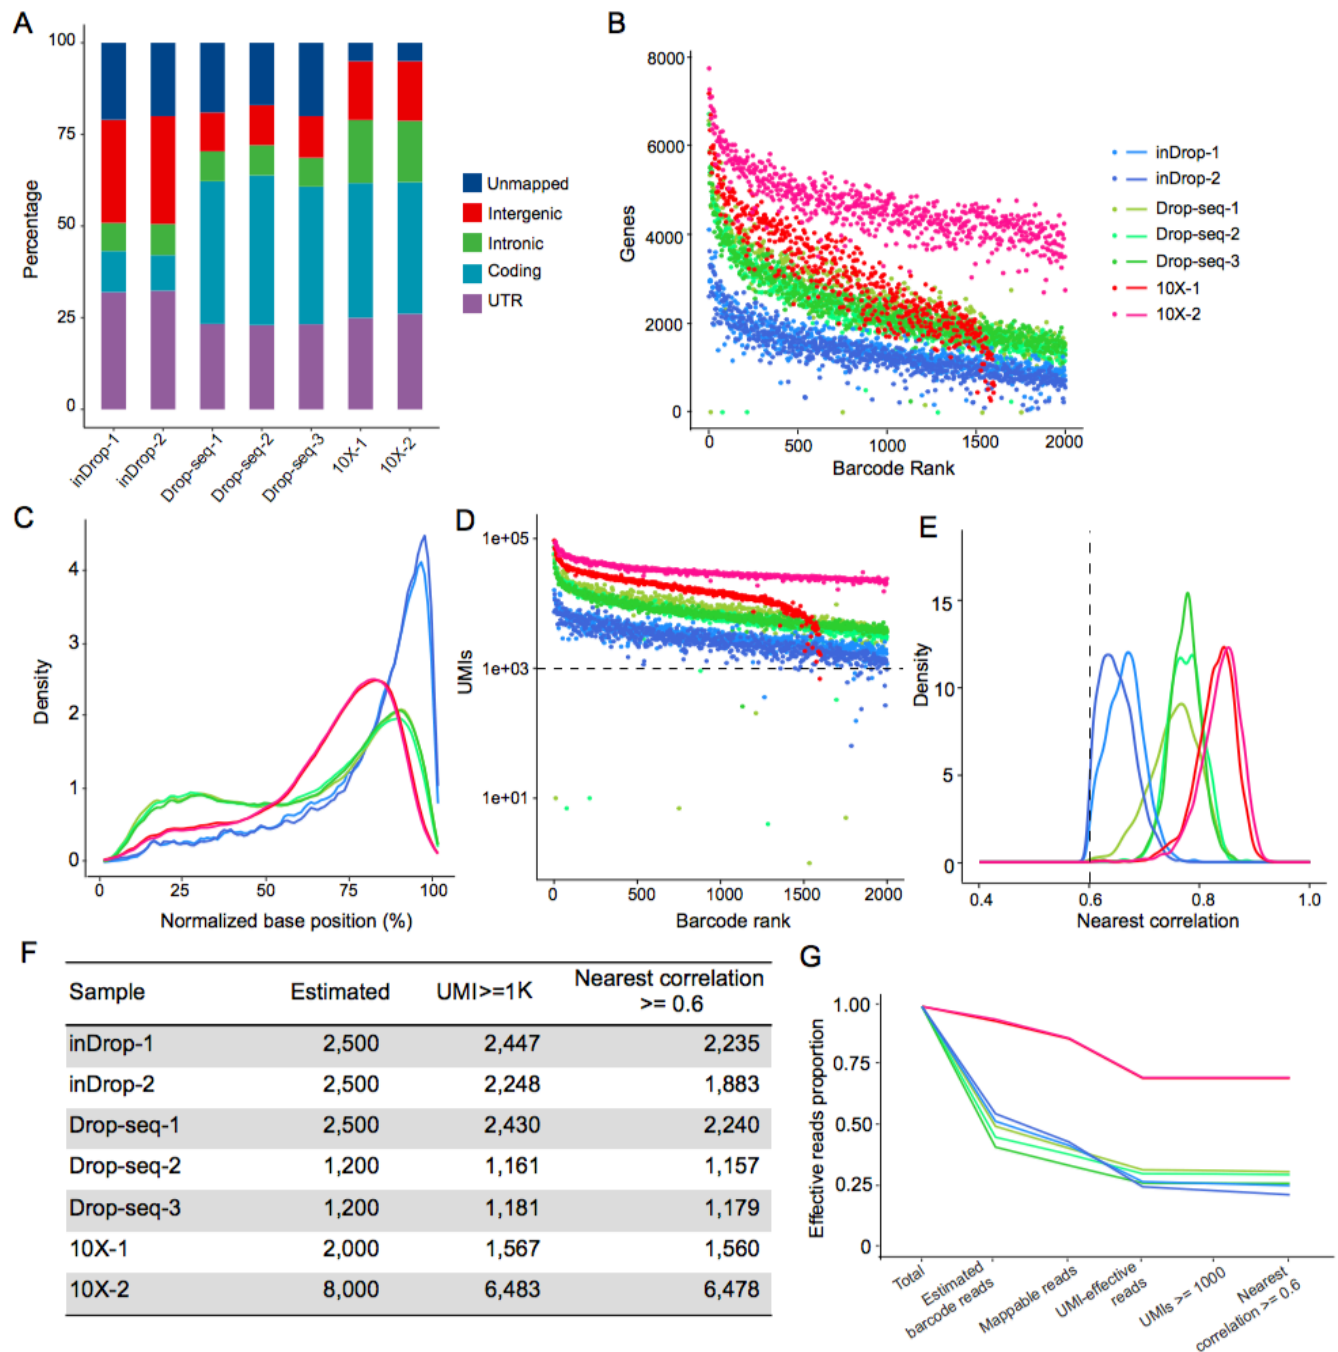

708

709

710

711

712

713

714

715

716

Figure 3. Data processing steps and results. (A) Read composition after mapping to the genome. Percentages of reads mapped to different genomic regions and unmapped reads are shown. (B) The number of genes detected with cell barcode ranked by read counts. (C) Normalized read distribution across the gene body from the 5' to the 3' end. (D) The number of UMIs with cell barcode ranked by read counts. (E) The distribution of cells' nearest correlation (see Methods); a threshold of 0.6 is applied for quality control. (F) The number of valid cell barcodes after each step of quality control filtering. (G) The proportion of effective reads after each step of quality control process (see Methods).

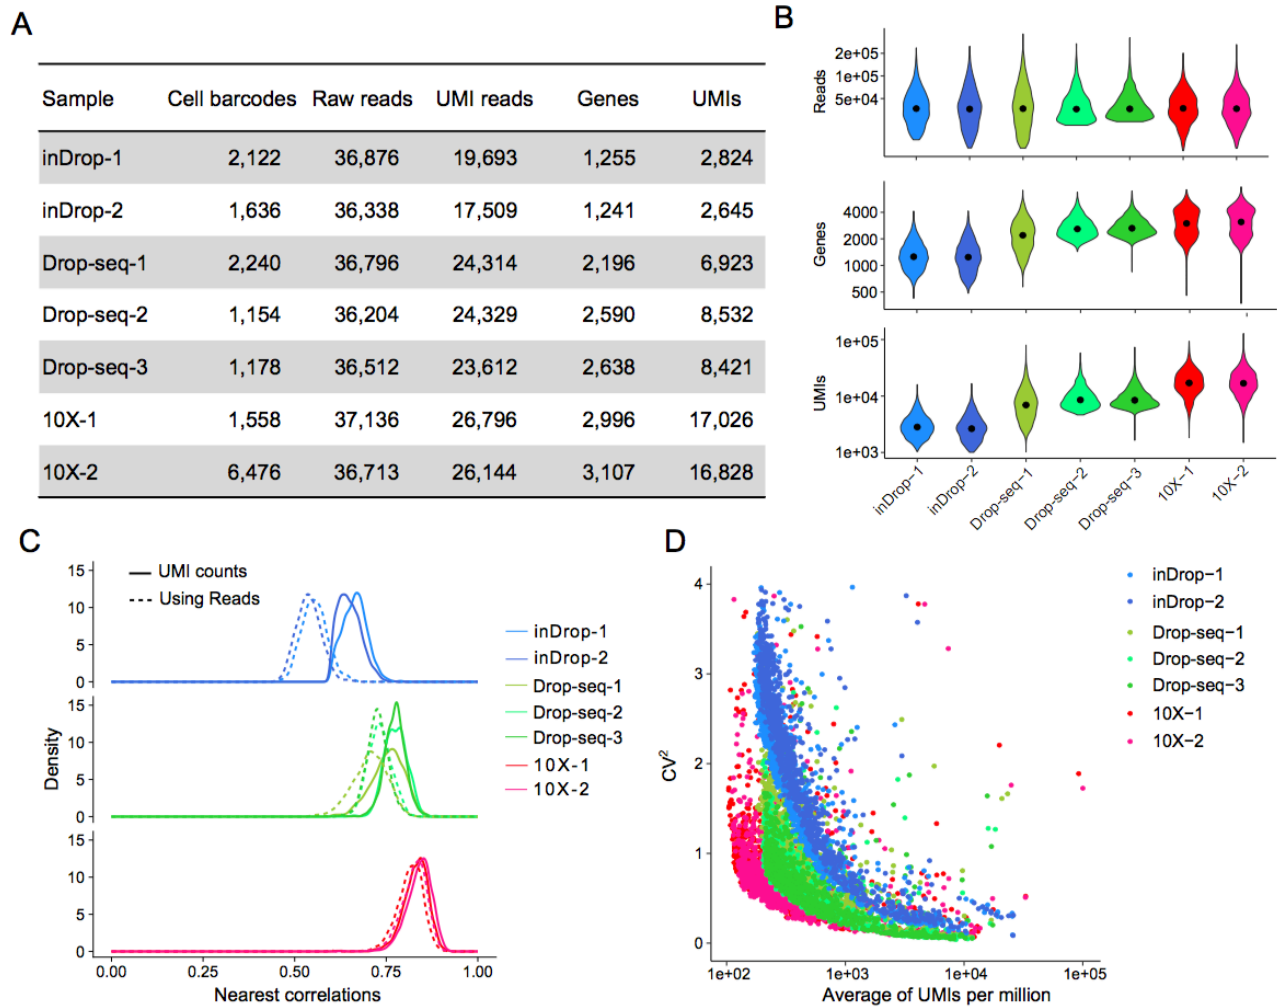

717

718 Figure 4. Demonstration of the sensitivity and technical noise of each platform. (A)

719 Summary of cell barcode numbers, read counts, and molecular detection

720 performance. The data are down-sampled to obtain a uniform level of raw reads

721 across all samples (see Methods). (B) The distribution of raw reads, UMIs, and

722 genes detected. (C) Technical noise measured by the nearest correlation between

723 one cell barcode and every other cell barcode within the same sample. Gene

724 quantifications through UMI counts (solid line) and read counts (dashed line) are

725 both adopted. (D) The CV-mean (CV squared) plot of each system. The technical

726 noise is measured at the gene level.



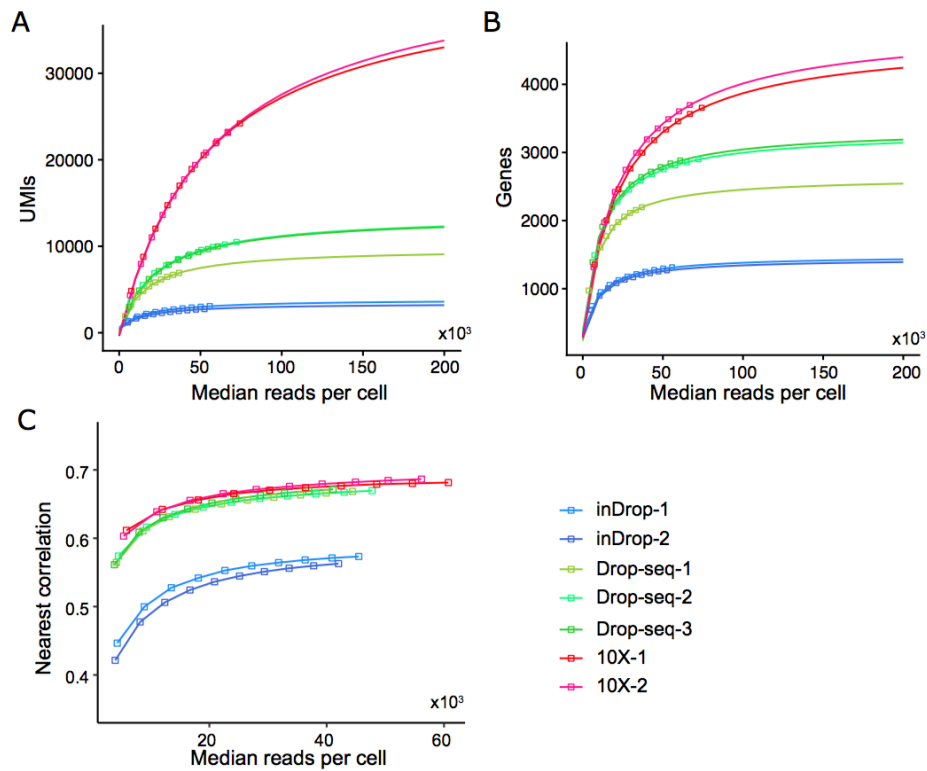

727

728

729

730

731

732

733

Figure 5. Transcriptome analysis sensitivity and noise level at different sequencing depths by subsampling analysis. Median numbers of UMIs (A) and genes (B) detected for each sample with increasing effective read counts. (C) Transcriptome analysis noise level saturates quickly with sequencing depth. The noise was measured as the nearest correlation (see Methods).

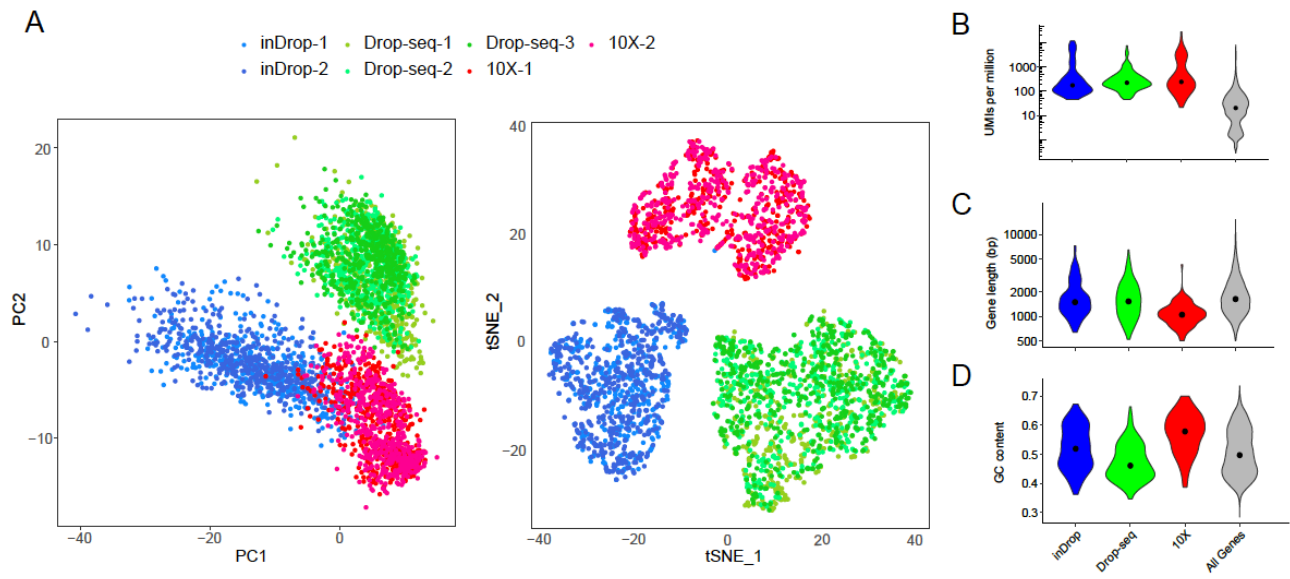

734

735 Figure 6. Transcriptome analysis bias in the three systems. (A, B) Visualization of

736 cell barcodes of all three systems clustered by PCA and tSNE. (B–D)

737 Demonstration of transcriptome analysis bias in gene expression level (B), gene

738 length (C), and GC content (D). The top 100 marker genes from each system

739 were used for demonstration.

740

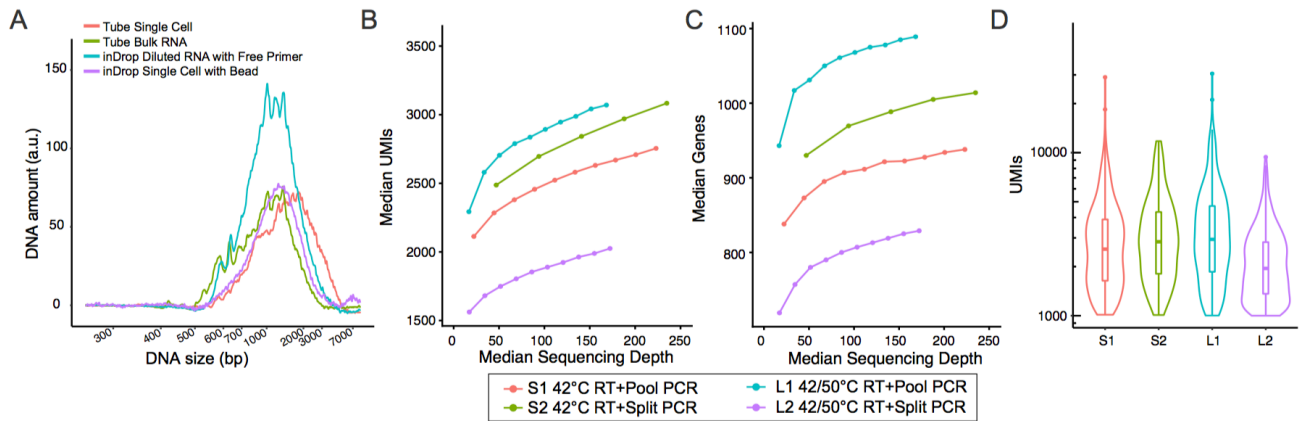

741

742

743

744

745

746

747

748

Figure 7. Adopting the Smart-seq2 protocol in the inDrop platform. (A) Comparison of cDNA fragment size between Smart-seq2 performed in tube and inDrop platform. (B, C) Four kinds of reaction with different reaction temperatures and PCR amplification strategies were performed (see Methods). Their median detected UMI (B) and gene (C) counts at various sequencing depths are shown. (D) The UMI distributions for four conditions at uniform sequencing depth (100K reads). The L1 condition has better sensitivity.
